# Supplementary material
Source: publisher figshare collection journal article supplement (https://acs.figshare.com/ndownloader/files/10633708)
Supplement: Supplementary file 1 [file 10633708]

## Supporting Information

### Chemical Characterization of Novel Natural Products from the Roots of Asian Rice (*Oryza sativa*) that Control Adipocyte and Osteoblast Differentiation

Hee Rae Kang,<sup>†,+</sup> Hyung Sik Yun,<sup>‡,+</sup> Tae Kyoung Lee,<sup>†</sup> Seulah Lee,<sup>†</sup> Seon-Hee Kim,<sup>§</sup> Eunjung Moon,<sup>||</sup> Ki-Moon Park,<sup>‡</sup> Ki Hyun Kim<sup>†,\*</sup>

<sup>†</sup>*School of Pharmacy, Sungkyunkwan University, Suwon 16419, Republic of Korea*

<sup>‡</sup>*Department of Food Science and Biotechnology, Sungkyunkwan University, Suwon 16419, Republic of Korea*

<sup>§</sup>*Sungkyun Biotech, Suwon 16419, Republic of Korea*

<sup>||</sup>*Charmzone R&D Center, Charmzone Co. LTD., Seoul 135-851, Republic of Korea*

\* Corresponding author:

Ki Hyun Kim, Tel: +82-31-290-7700; Fax: +82-31-290-7730; E-mail: khkim83@skku.edu

## Supporting Information Contents:

|                                                                                                       |         |
|-------------------------------------------------------------------------------------------------------|---------|
| Figure S1. Extraction, solvent-partitioning, and bioactivity tests of the fractions.....              | S3      |
| Figure S2. The HR-ESIMS data of <b>1</b> .....                                                        | S4      |
| Figure S3. The $^1\text{H}$ NMR spectrum of <b>1</b> ( $\text{CD}_3\text{OD}$ , 700 MHz).....         | S5      |
| Figure S4. The $^{13}\text{C}$ NMR spectrum of <b>1</b> ( $\text{CD}_3\text{OD}$ , 175 MHz).....      | S6      |
| Figure S5. The $^1\text{H}$ - $^1\text{H}$ COSY spectrum of <b>1</b> ( $\text{CD}_3\text{OD}$ ).....  | S7      |
| Figure S6. The HSQC spectrum of <b>1</b> ( $\text{CD}_3\text{OD}$ ).....                              | S8      |
| Figure S7. The HMBC spectrum of <b>1</b> ( $\text{CD}_3\text{OD}$ ).....                              | S9      |
| Figure S8. The expanded key HMBC spectrum of <b>1</b> ( $\text{CD}_3\text{OD}$ ).....                 | S10     |
| Figure S9. The HR-ESIMS data of <b>2</b> .....                                                        | S11     |
| Figure S10. The $^1\text{H}$ NMR spectrum of <b>2</b> ( $\text{CD}_3\text{OD}$ , 700 MHz).....        | S12     |
| Figure S11. The $^{13}\text{C}$ NMR spectrum of <b>2</b> ( $\text{CD}_3\text{OD}$ , 175 MHz).....     | S13     |
| Figure S12. The $^1\text{H}$ - $^1\text{H}$ COSY spectrum of <b>2</b> ( $\text{CD}_3\text{OD}$ )..... | S14     |
| Figure S13. The HSQC spectrum of <b>2</b> ( $\text{CD}_3\text{OD}$ ).....                             | S15     |
| Figure S14. The HMBC spectrum of <b>2</b> ( $\text{CD}_3\text{OD}$ ).....                             | S16     |
| Figure S15. The expanded key HMBC spectrum of <b>2</b> ( $\text{CD}_3\text{OD}$ ).....                | S17-S18 |
| General Experimental Procedures.....                                                                  | S19-S20 |
| Cell Culture and Differentiation.....                                                                 | S20     |

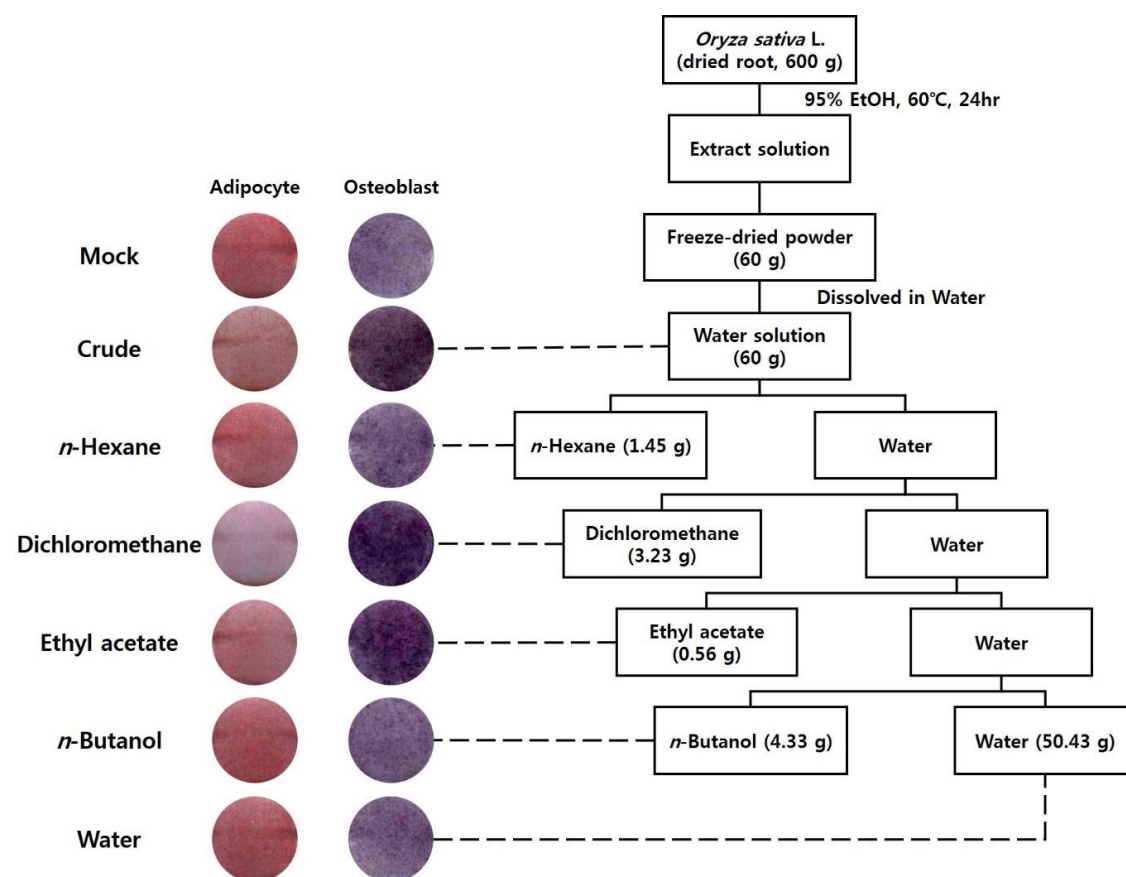

**Figure S1.** Extraction, solvent-partitioning, and bioactivity tests of the fractions. The dried *Oryza sativa* roots were extracted with 95% aqueous EtOH, and the resulting EtOH extract powder was solvent-fractionated with *n*-hexane, dichloromethane, ethyl acetate, *n*-butanol, and water. C3H10T1/2 cells were stimulated to differentiate into either adipocytes or osteoblasts, treated with each fraction, and stained with either ORO for adipocytes or with ALP for osteoblasts.

**Figure S2.** The HR-ESIMS data of **1**

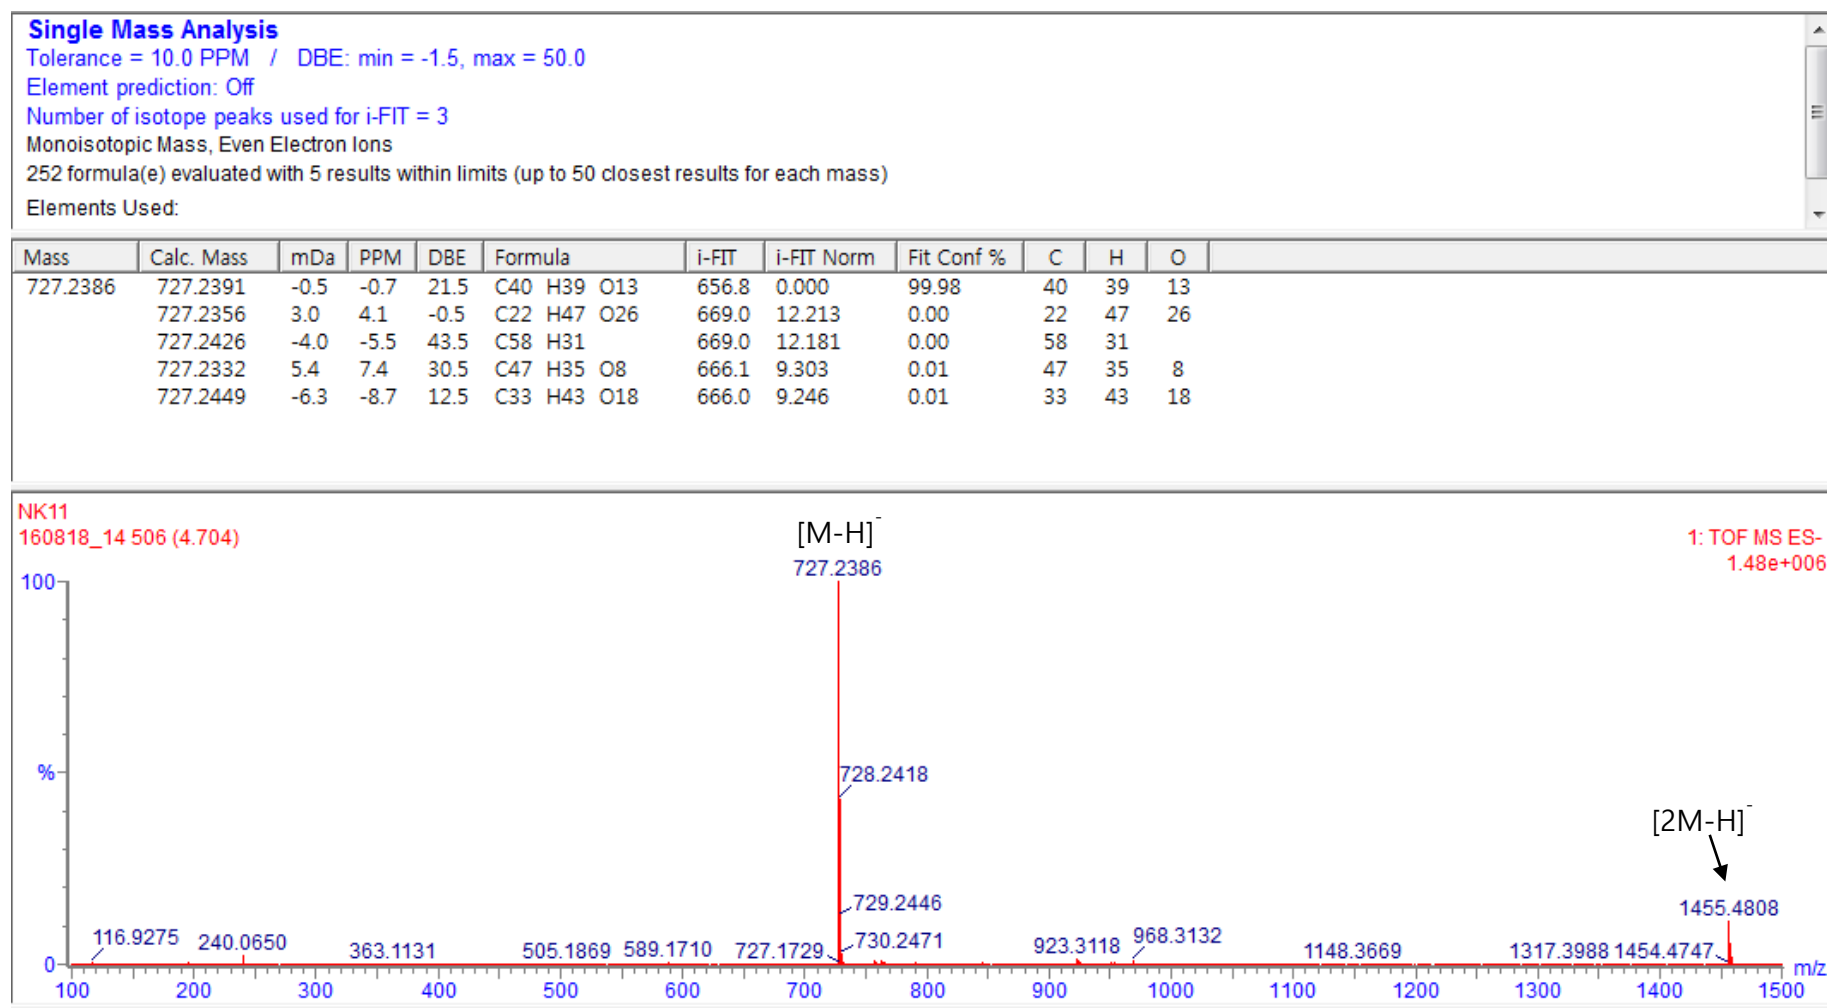

**Figure S3.** The  $^1\text{H}$  NMR spectrum of **1** ( $\text{CD}_3\text{OD}$ , 700 MHz)

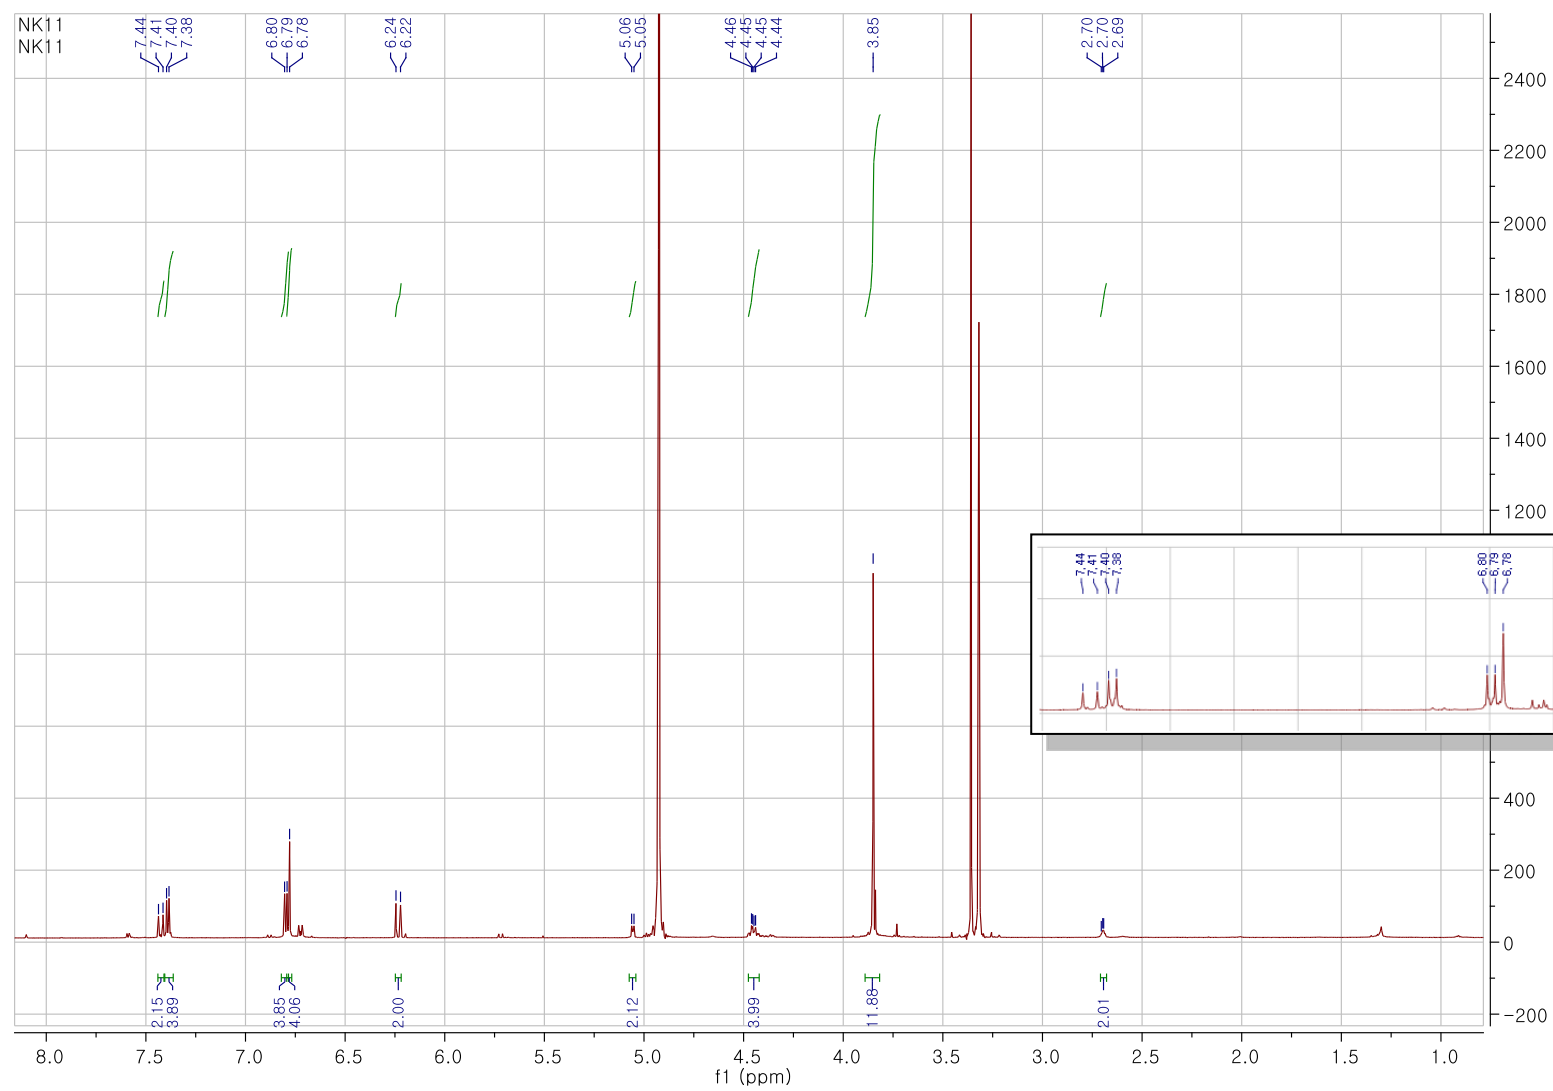

**Figure S4.** The  $^{13}\text{C}$  NMR spectrum of **1** ( $\text{CD}_3\text{OD}$ , 175 MHz)

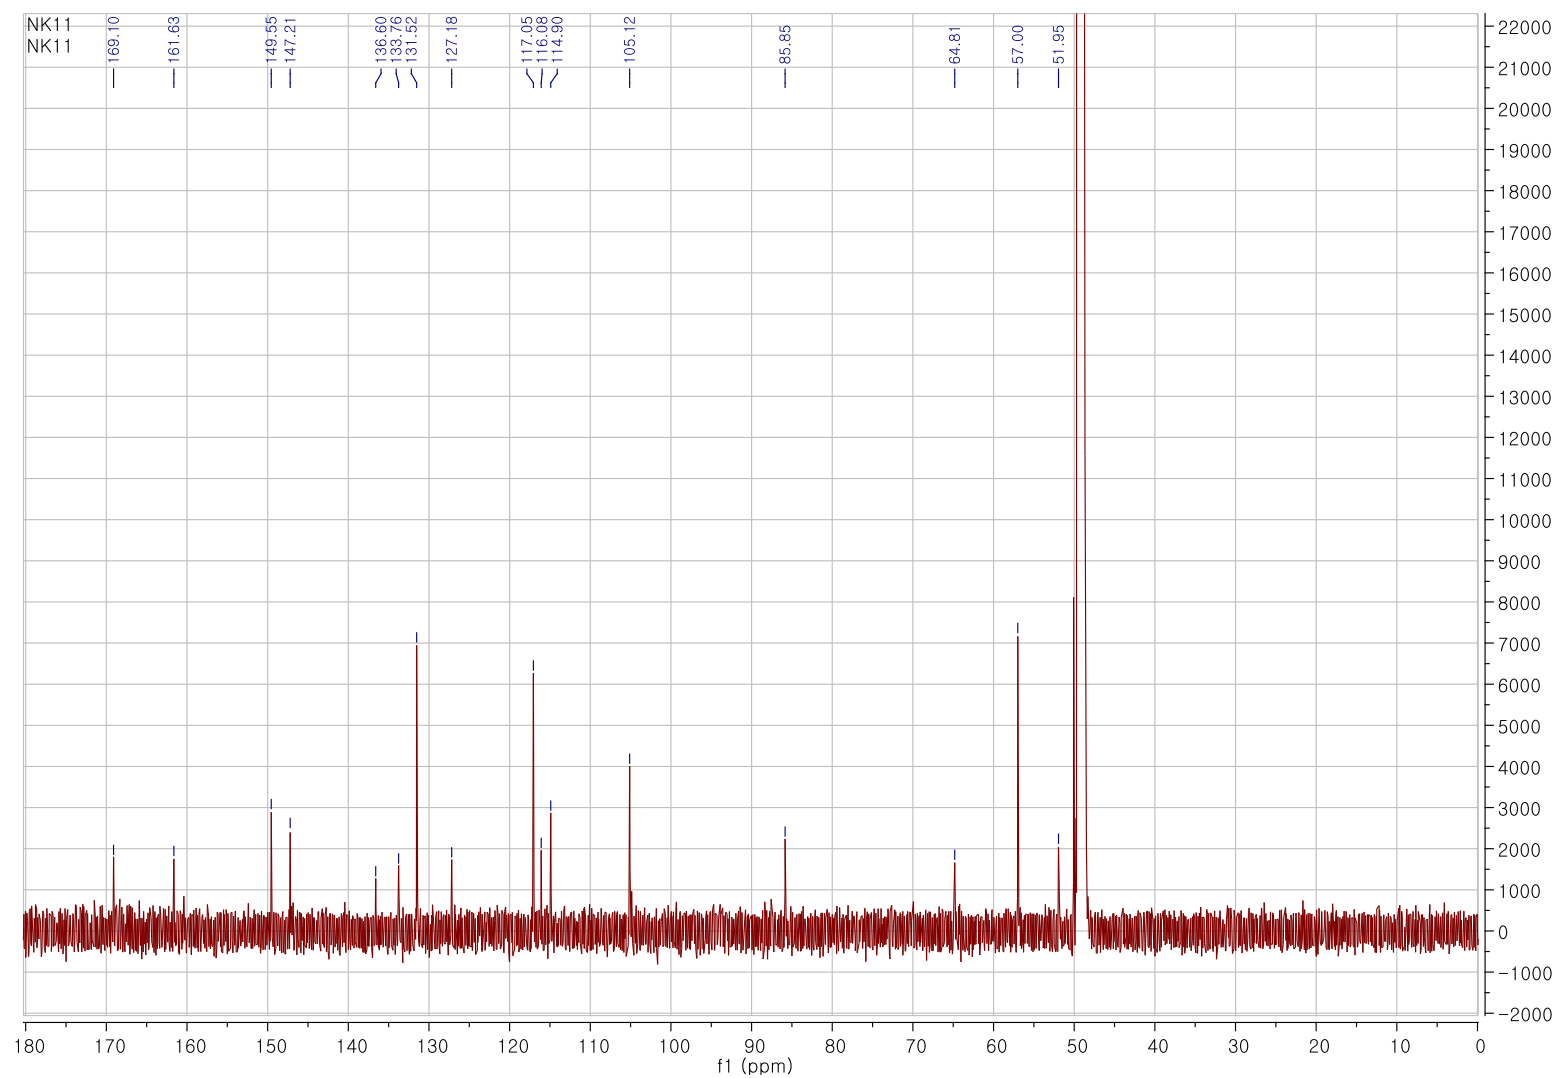

**Figure S5.** The  $^1\text{H}$ - $^1\text{H}$  COSY spectrum of **1** ( $\text{CD}_3\text{OD}$ )

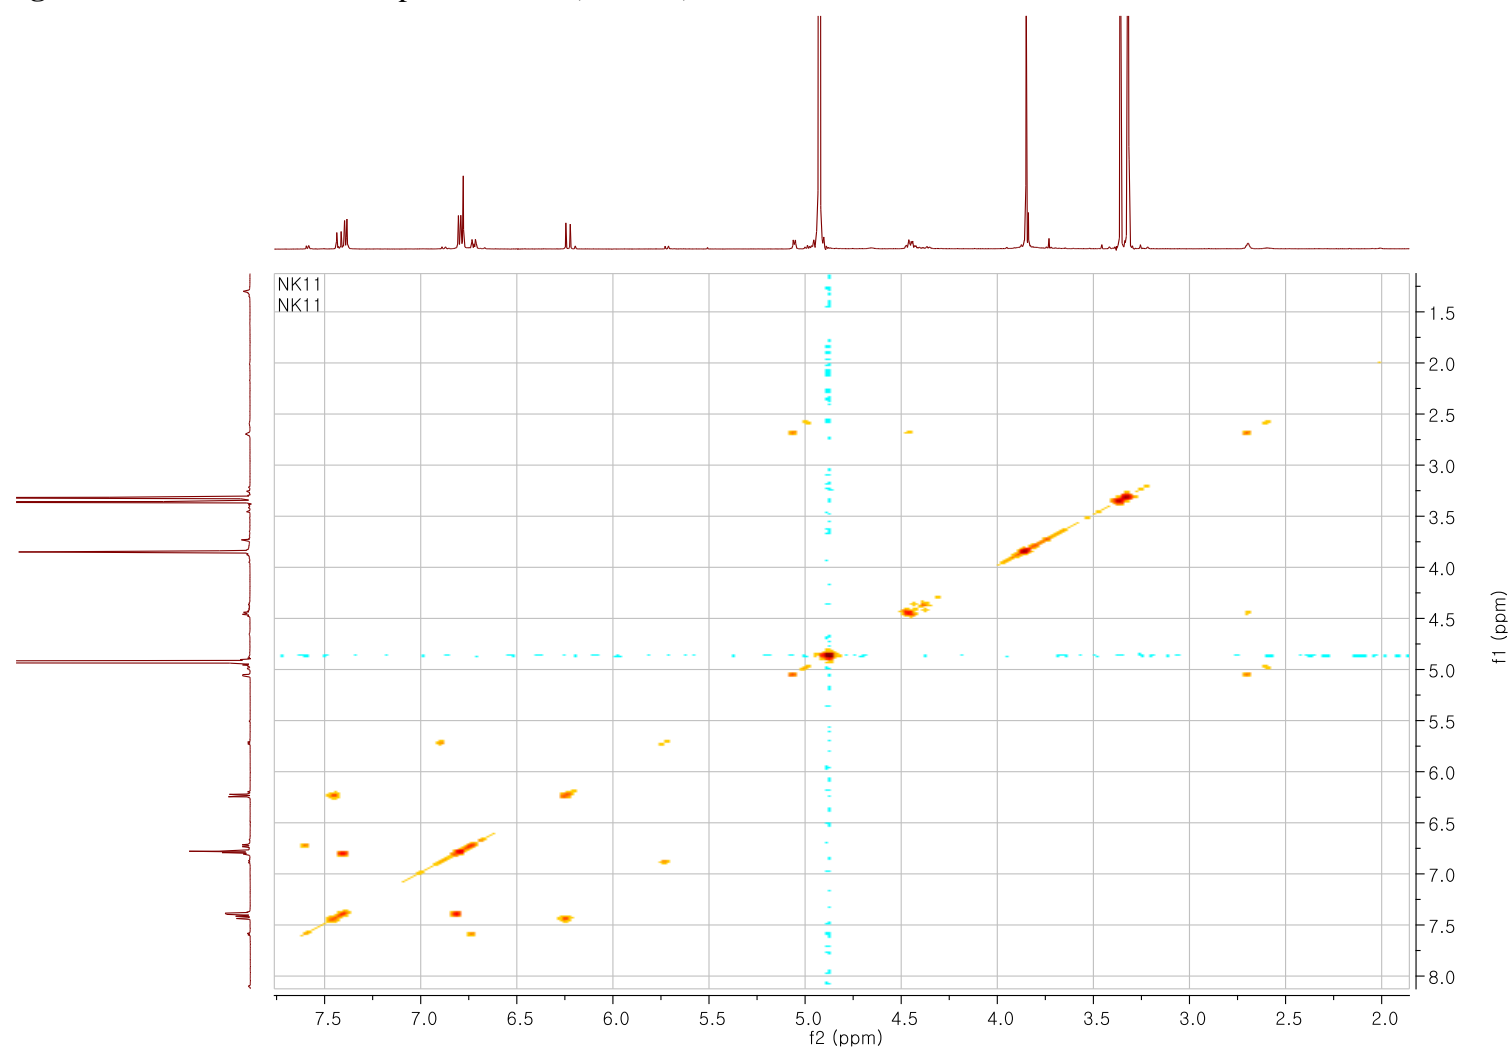

**Figure S6.** The HSQC spectrum of **1** (CD<sub>3</sub>OD)

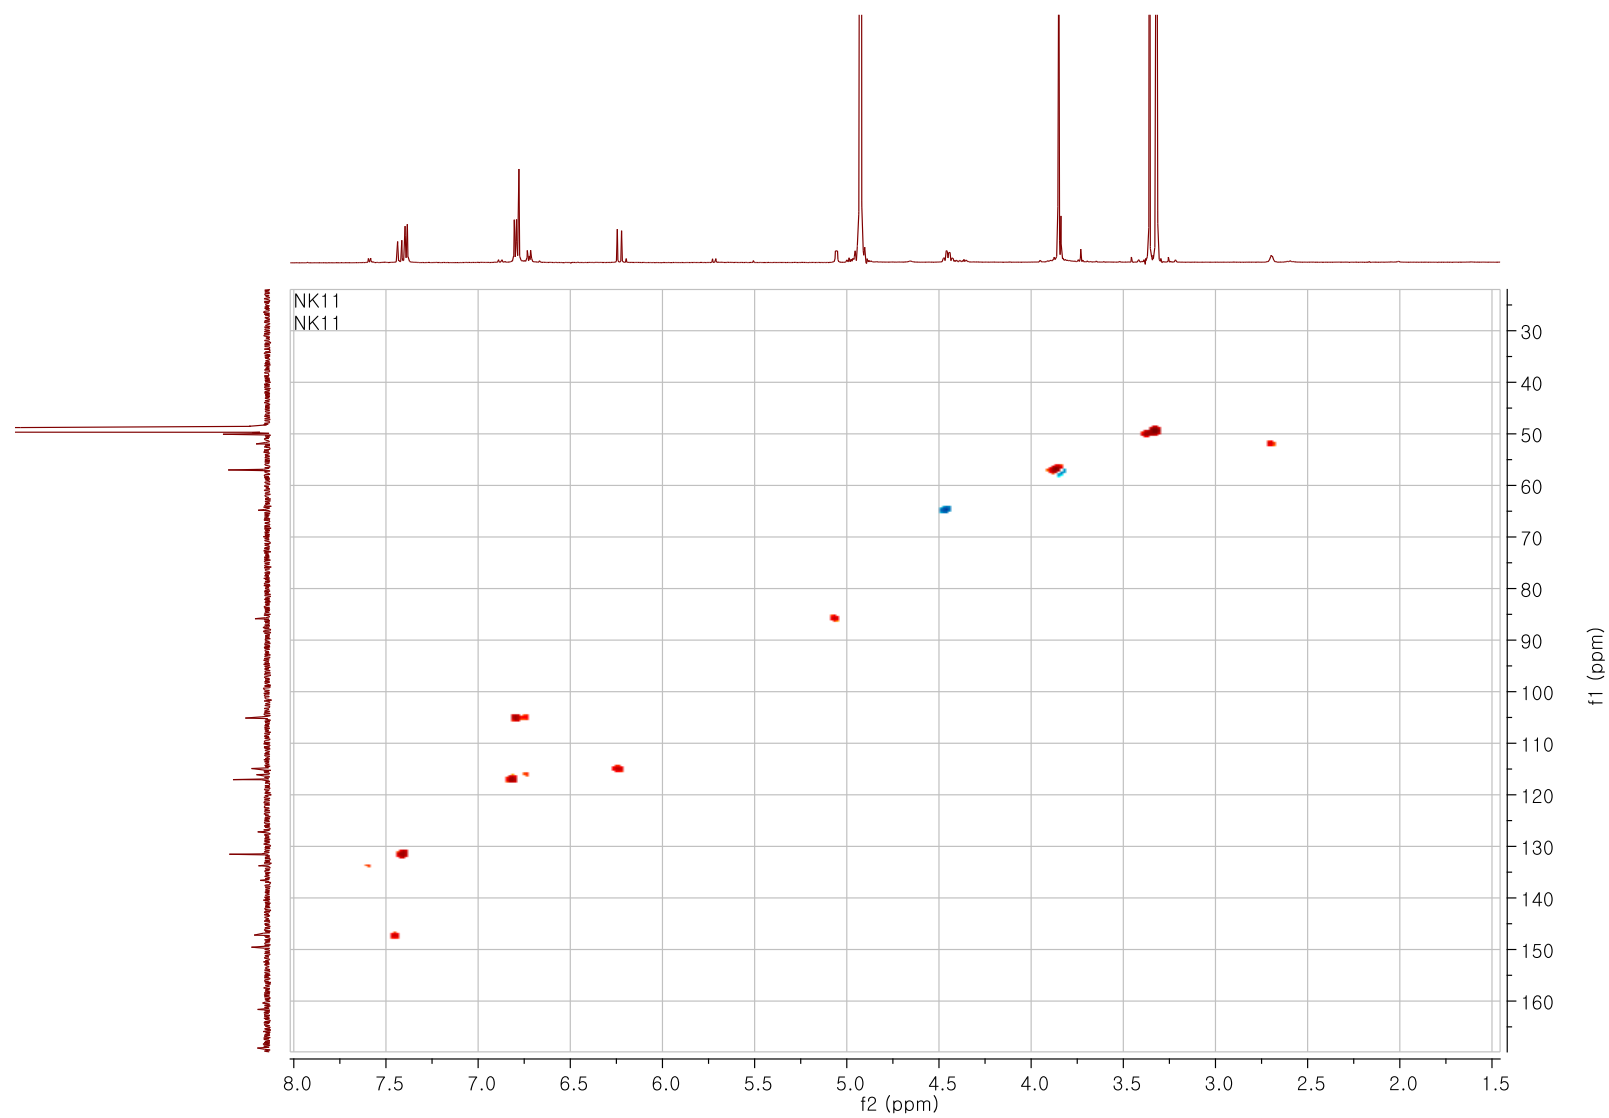



**Figure S7.** The HMBC spectrum of **1** (CD<sub>3</sub>OD)

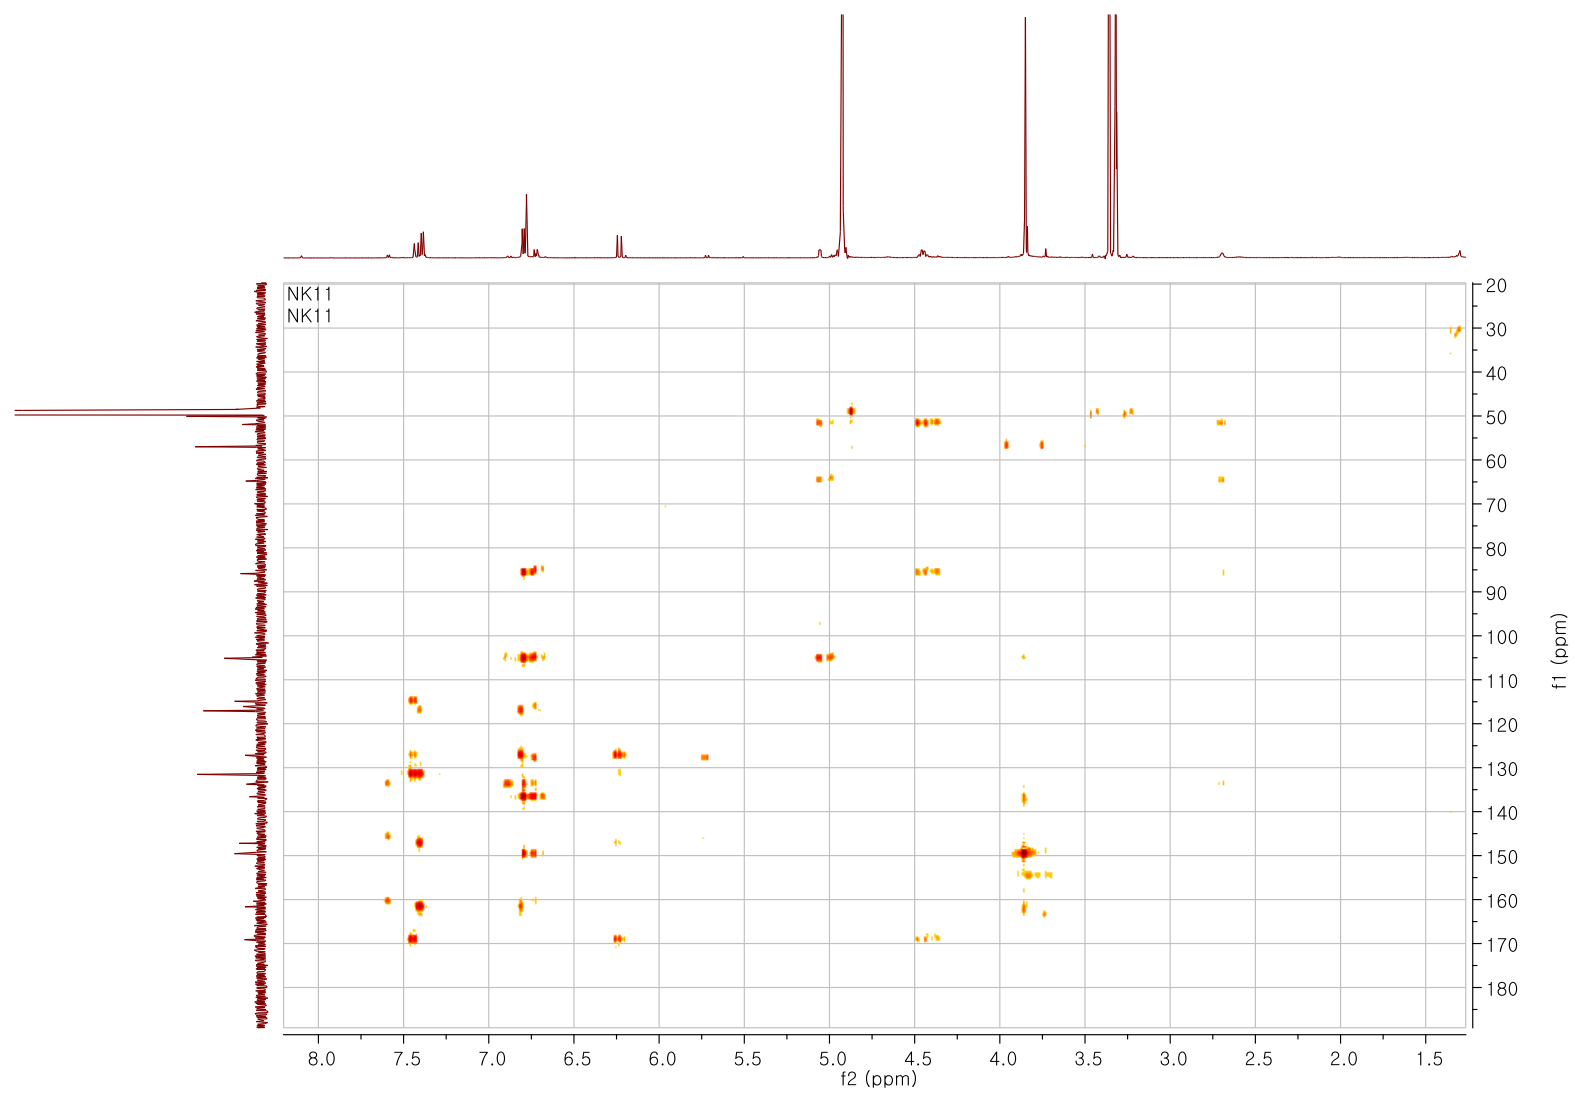

**Figure S8.** The expanded key HMBC spectrum of **1** (CD<sub>3</sub>OD)

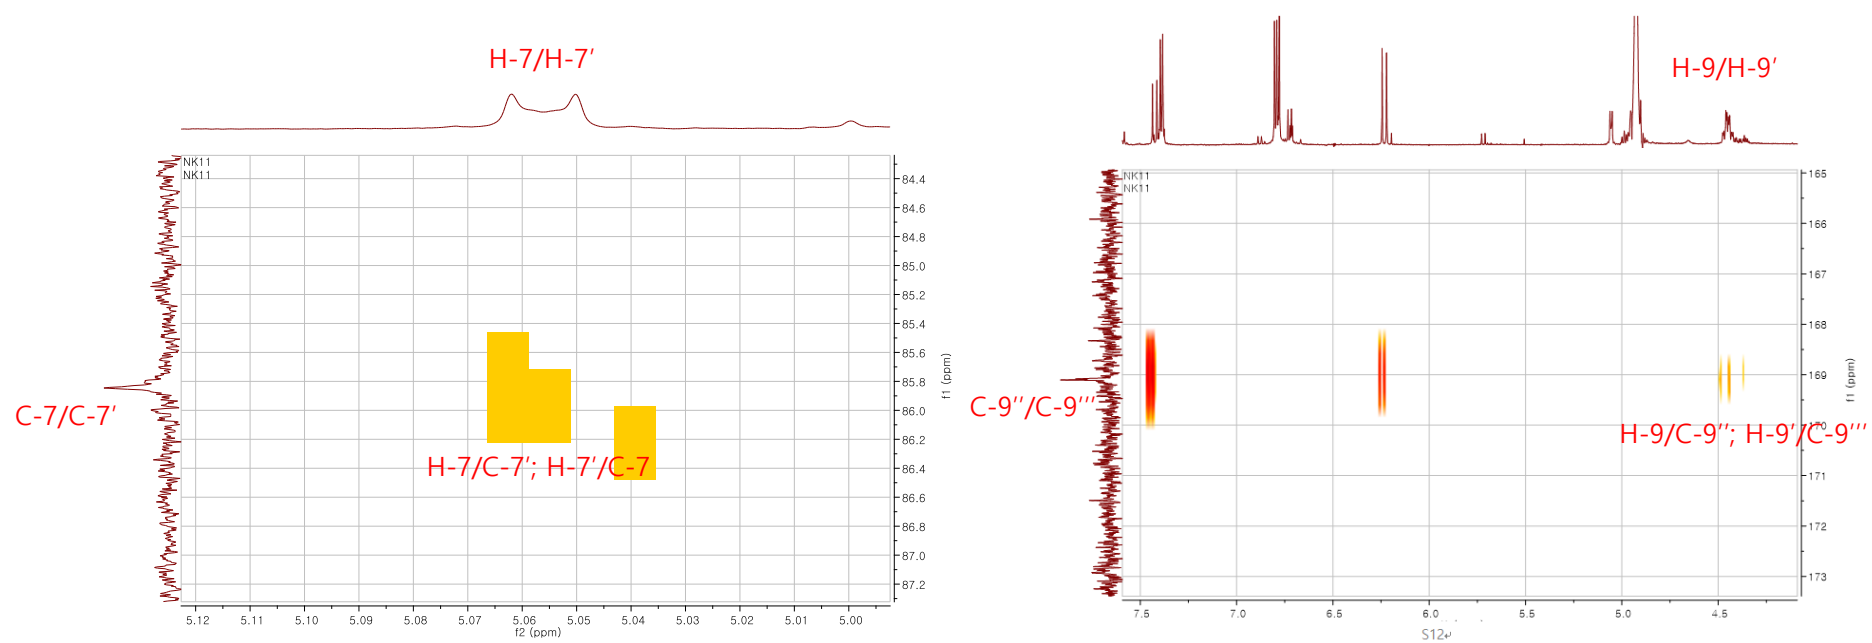

**Figure S9.** The HR-ESIMS data of **2**

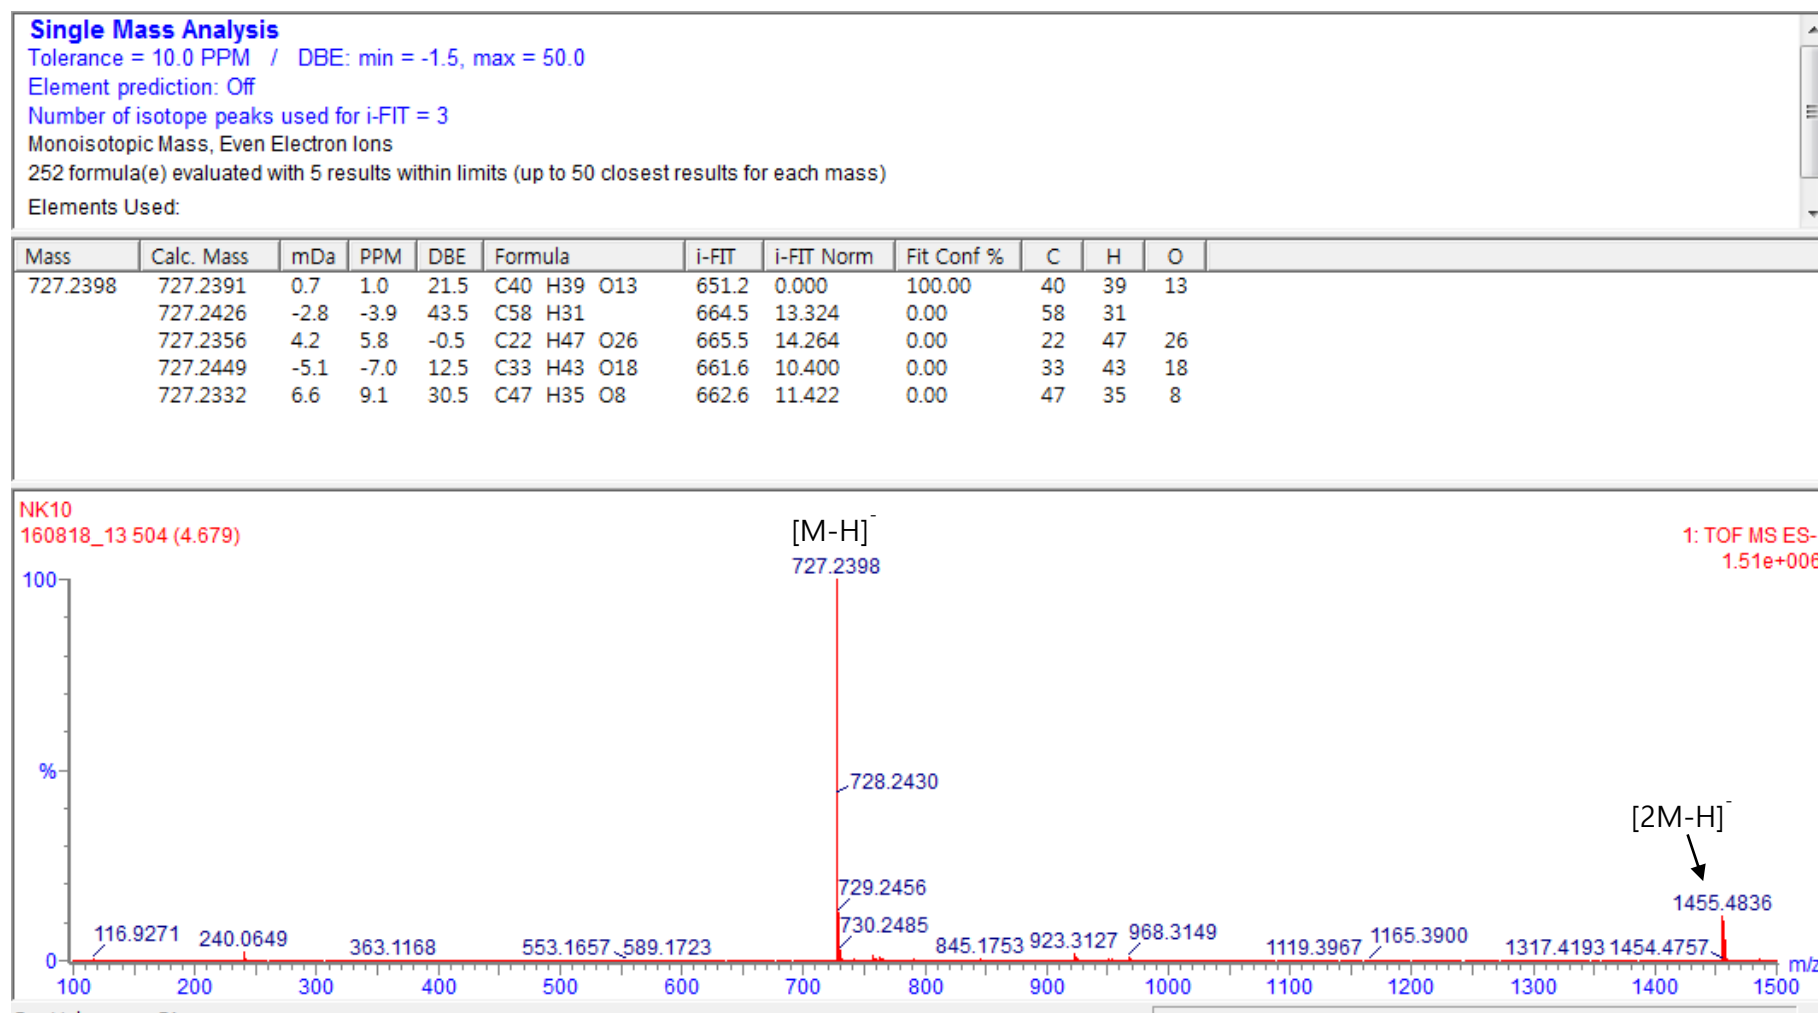

**Figure S10.** The  $^1\text{H}$  NMR spectrum of **2** ( $\text{CD}_3\text{OD}$ , 700 MHz)

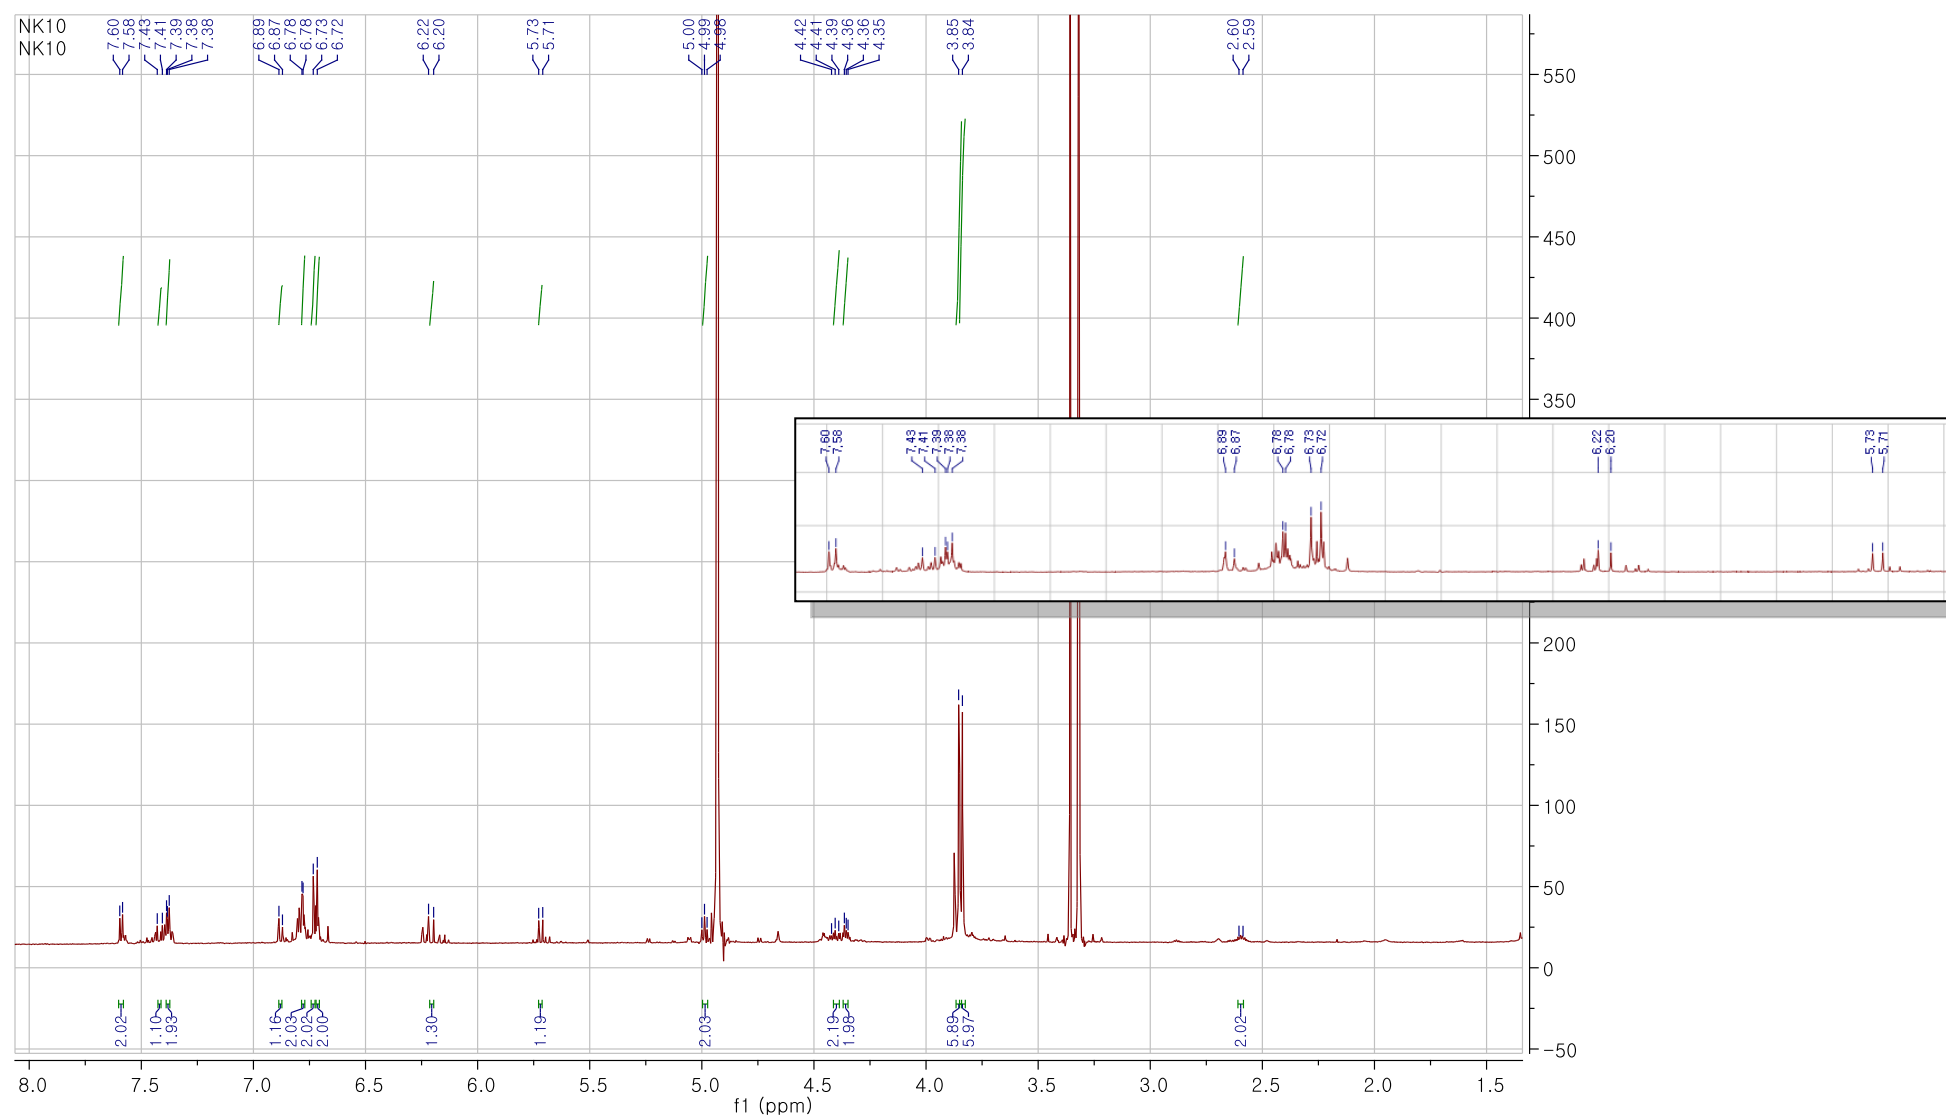

**Figure S11.** The  $^{13}\text{C}$  NMR spectrum of **2** ( $\text{CD}_3\text{OD}$ , 175 MHz)

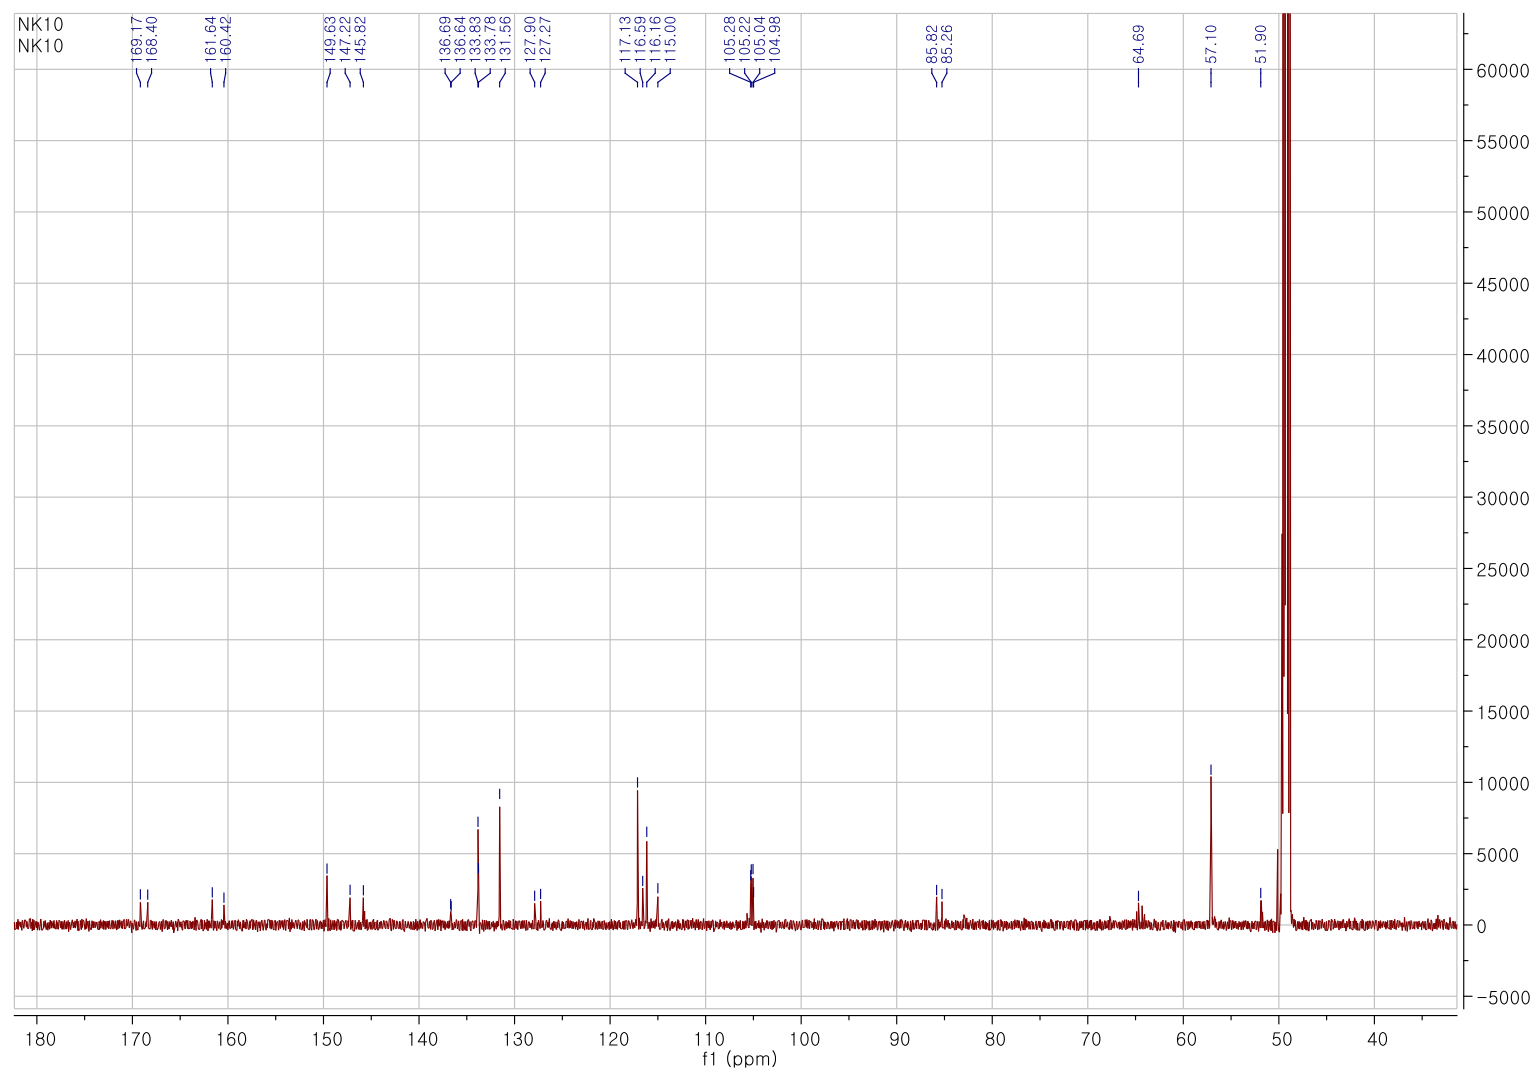

**Figure S12.** The  $^1\text{H}$ - $^1\text{H}$  COSY spectrum of **2** ( $\text{CD}_3\text{OD}$ )

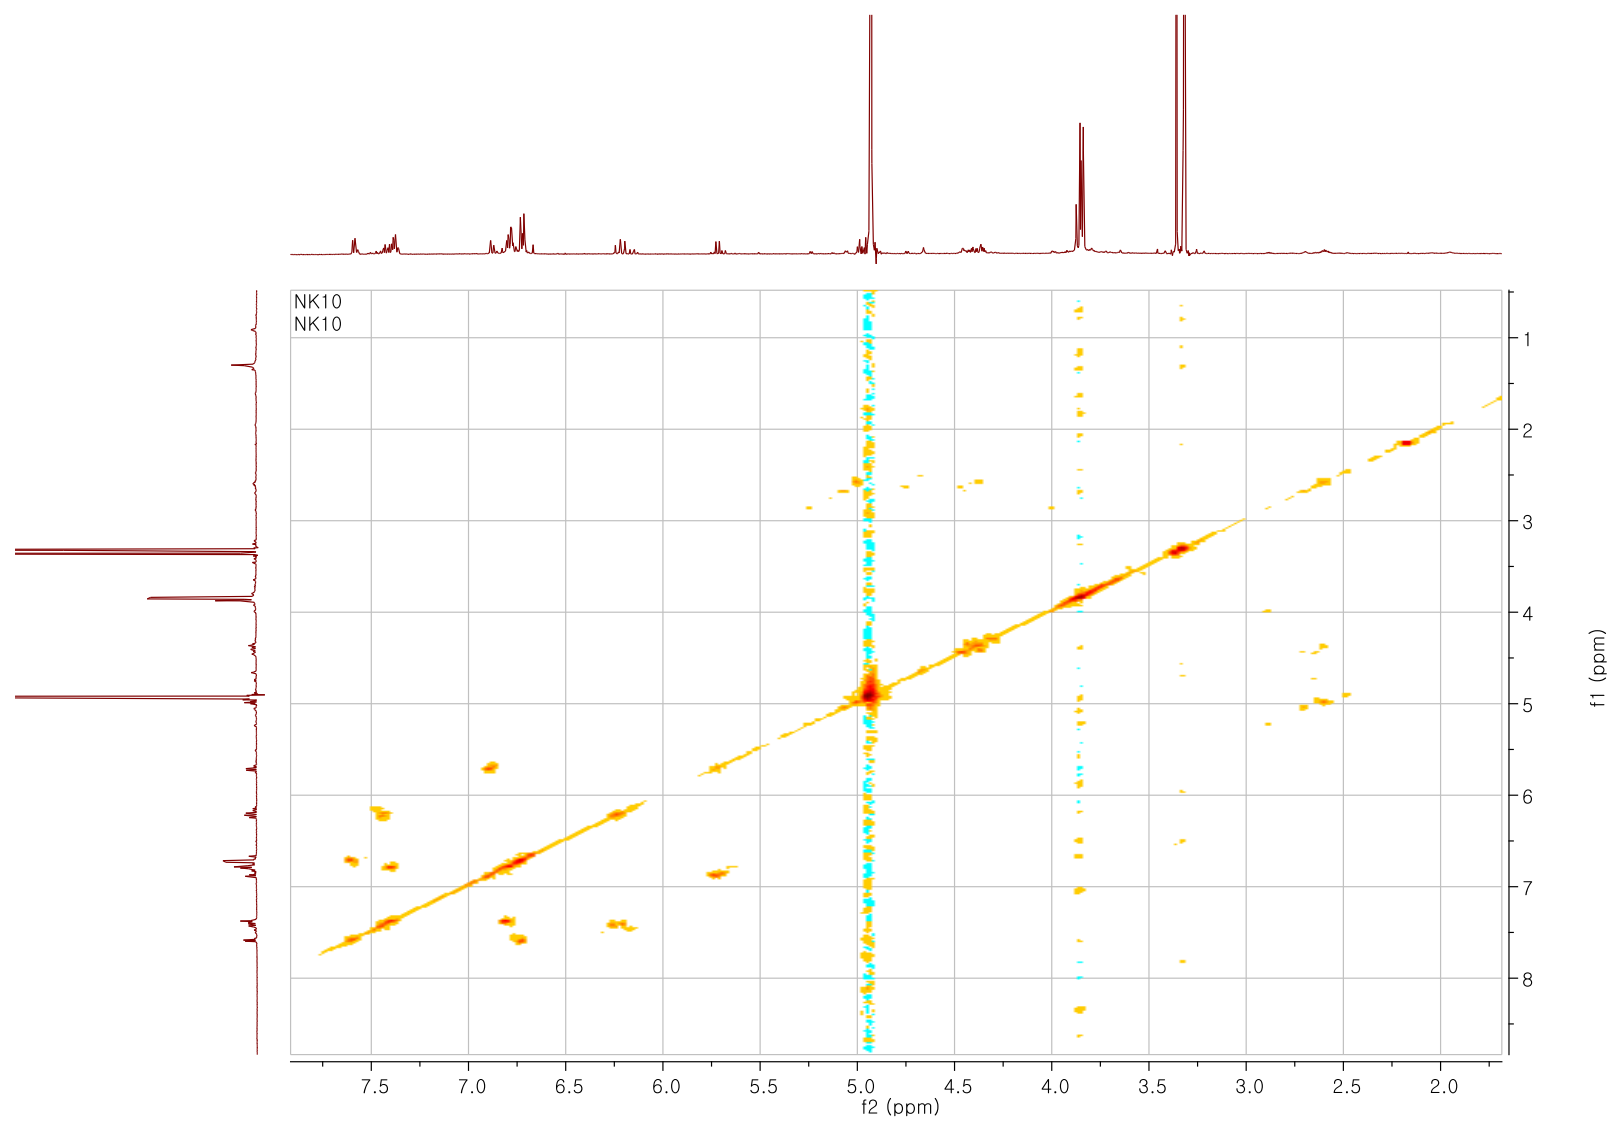

**Figure S13.** The HSQC spectrum of **2** (CD<sub>3</sub>OD)

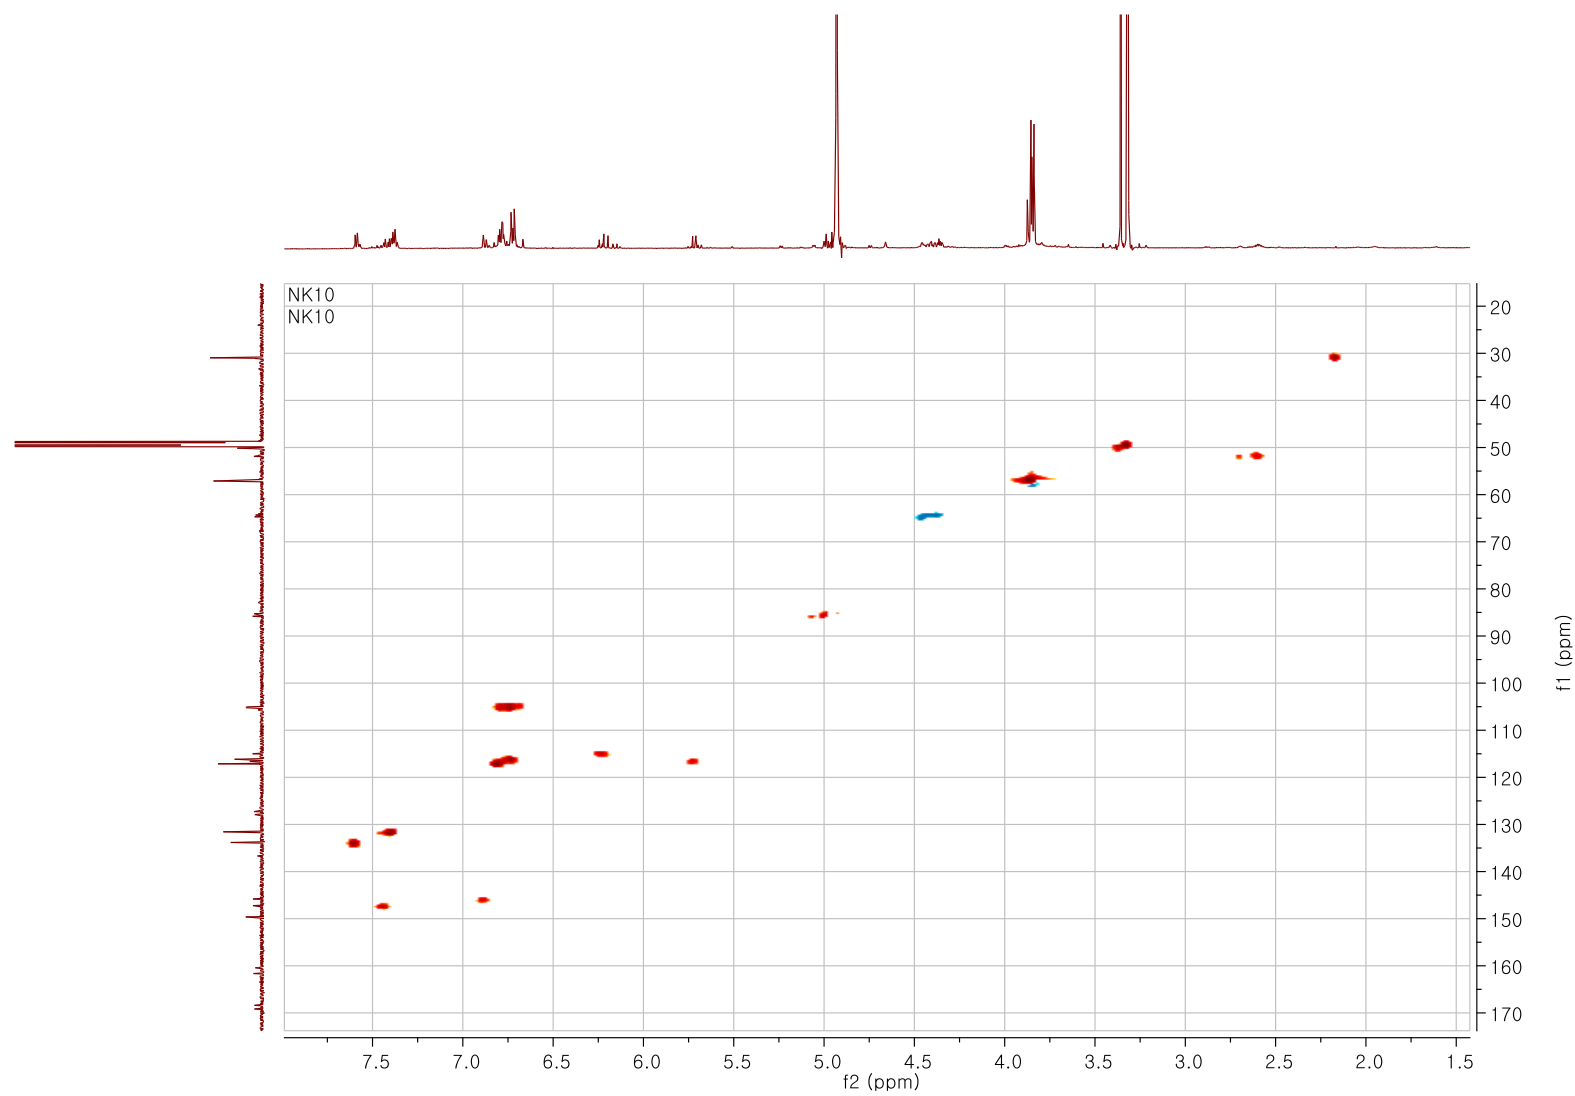

**Figure S14.** The HMBC spectrum of **2** (CD<sub>3</sub>OD)

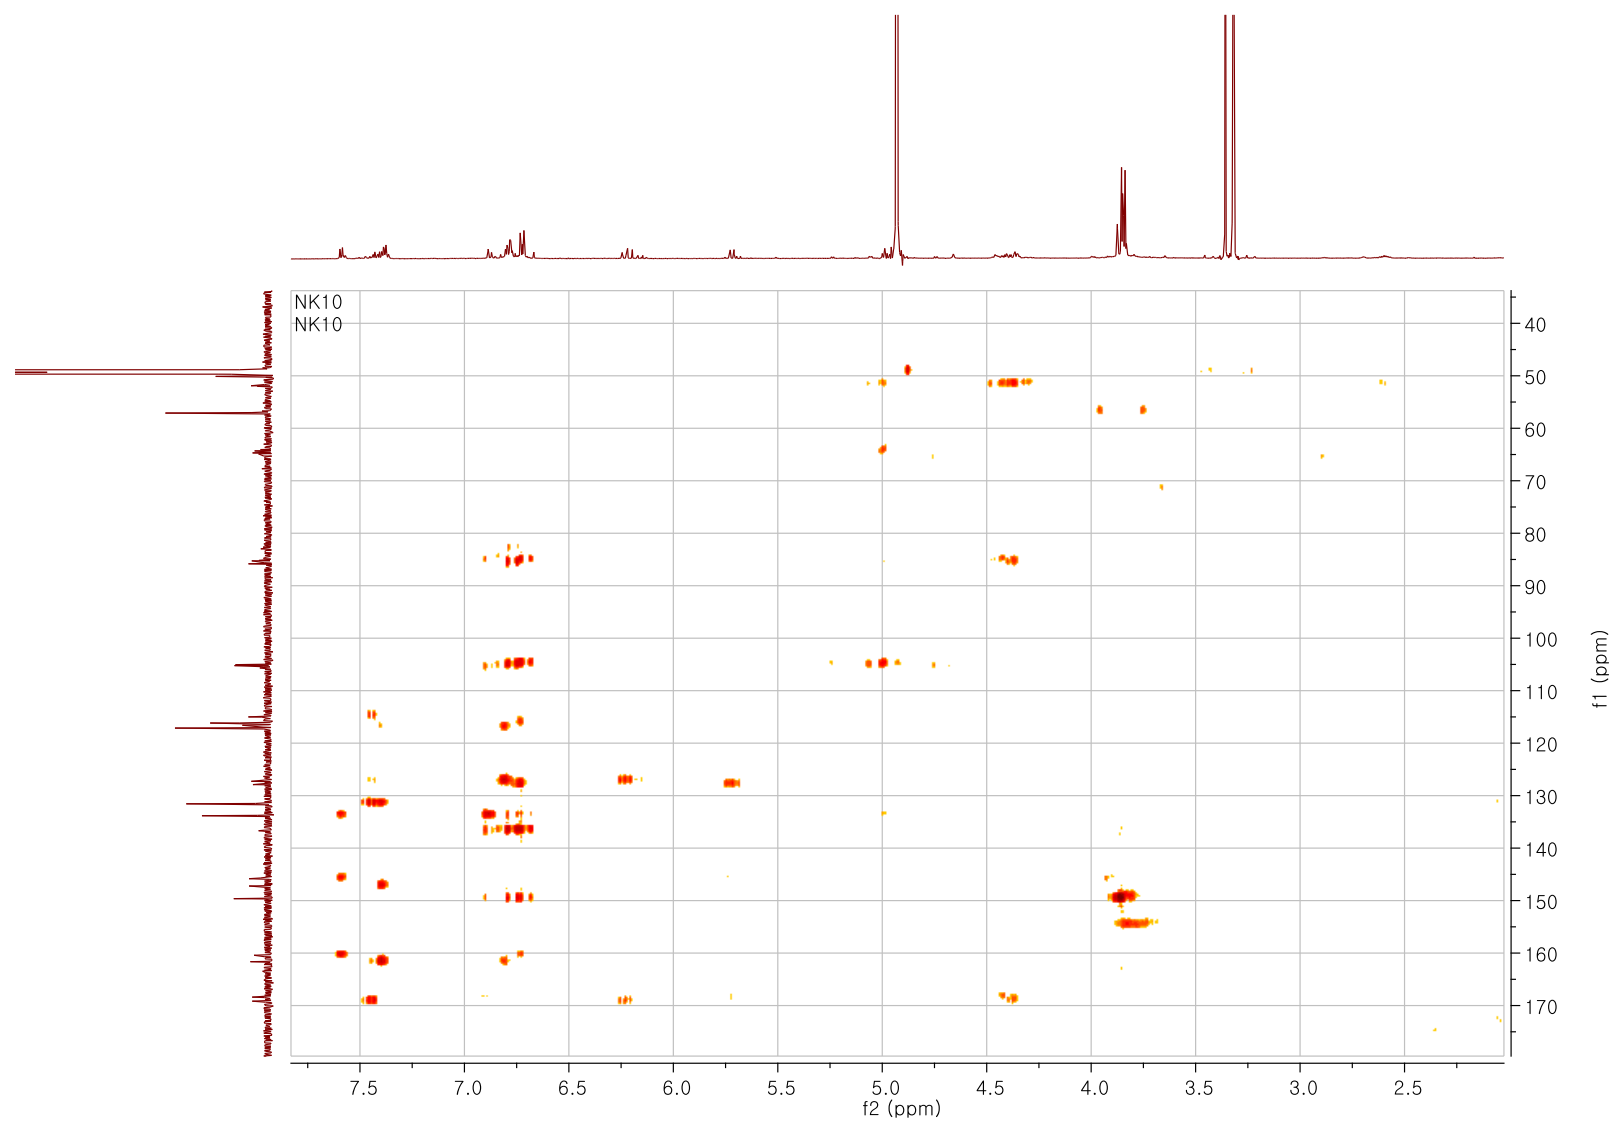



**Figure S15.** The expanded key HMBC spectrum of **2** (CD<sub>3</sub>OD)

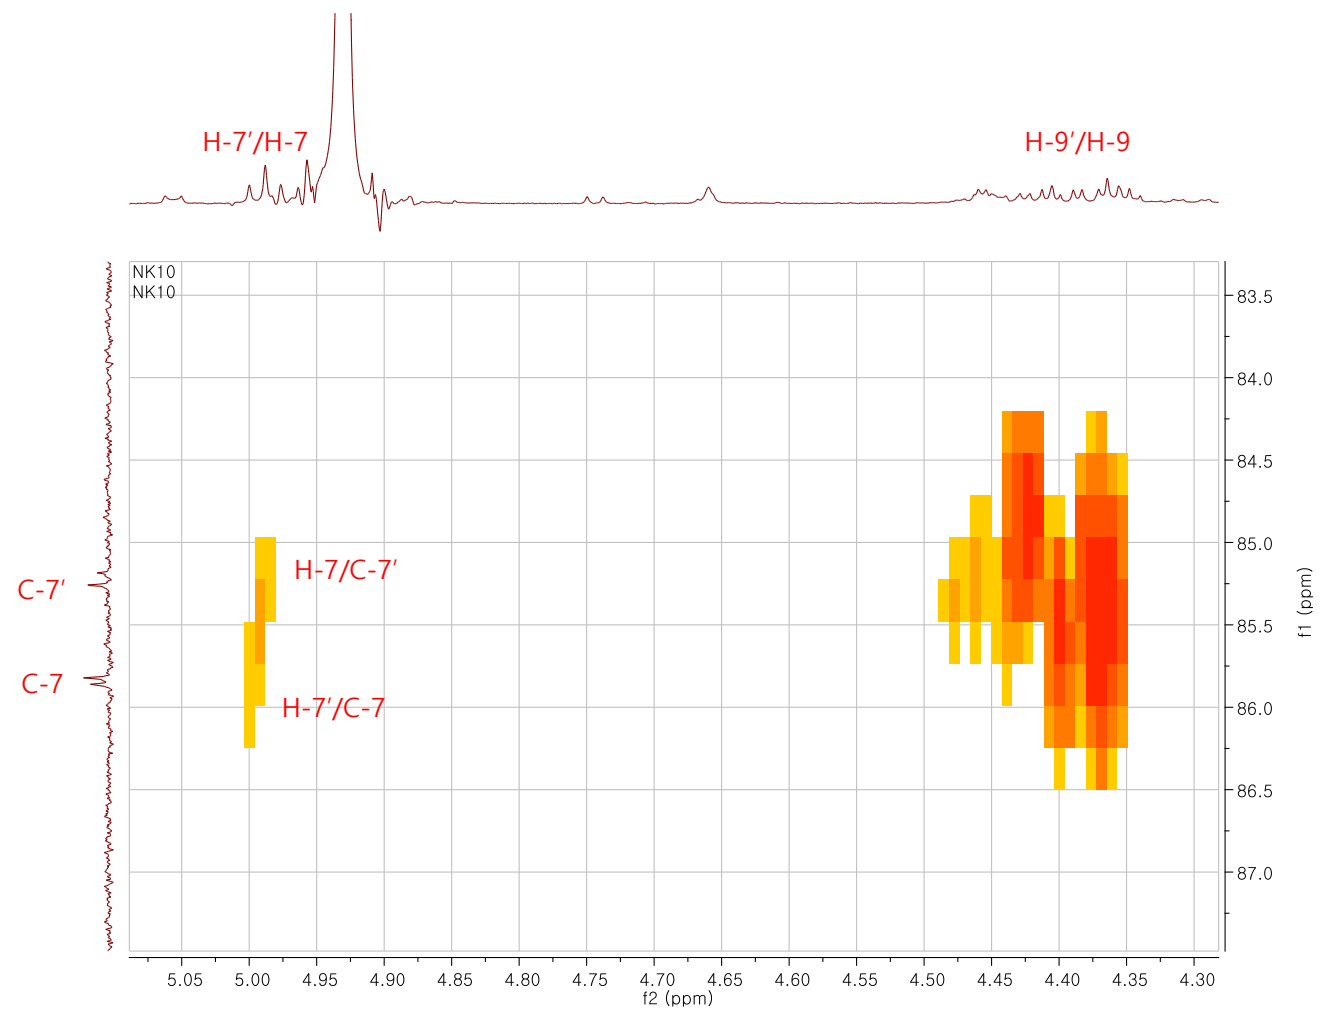

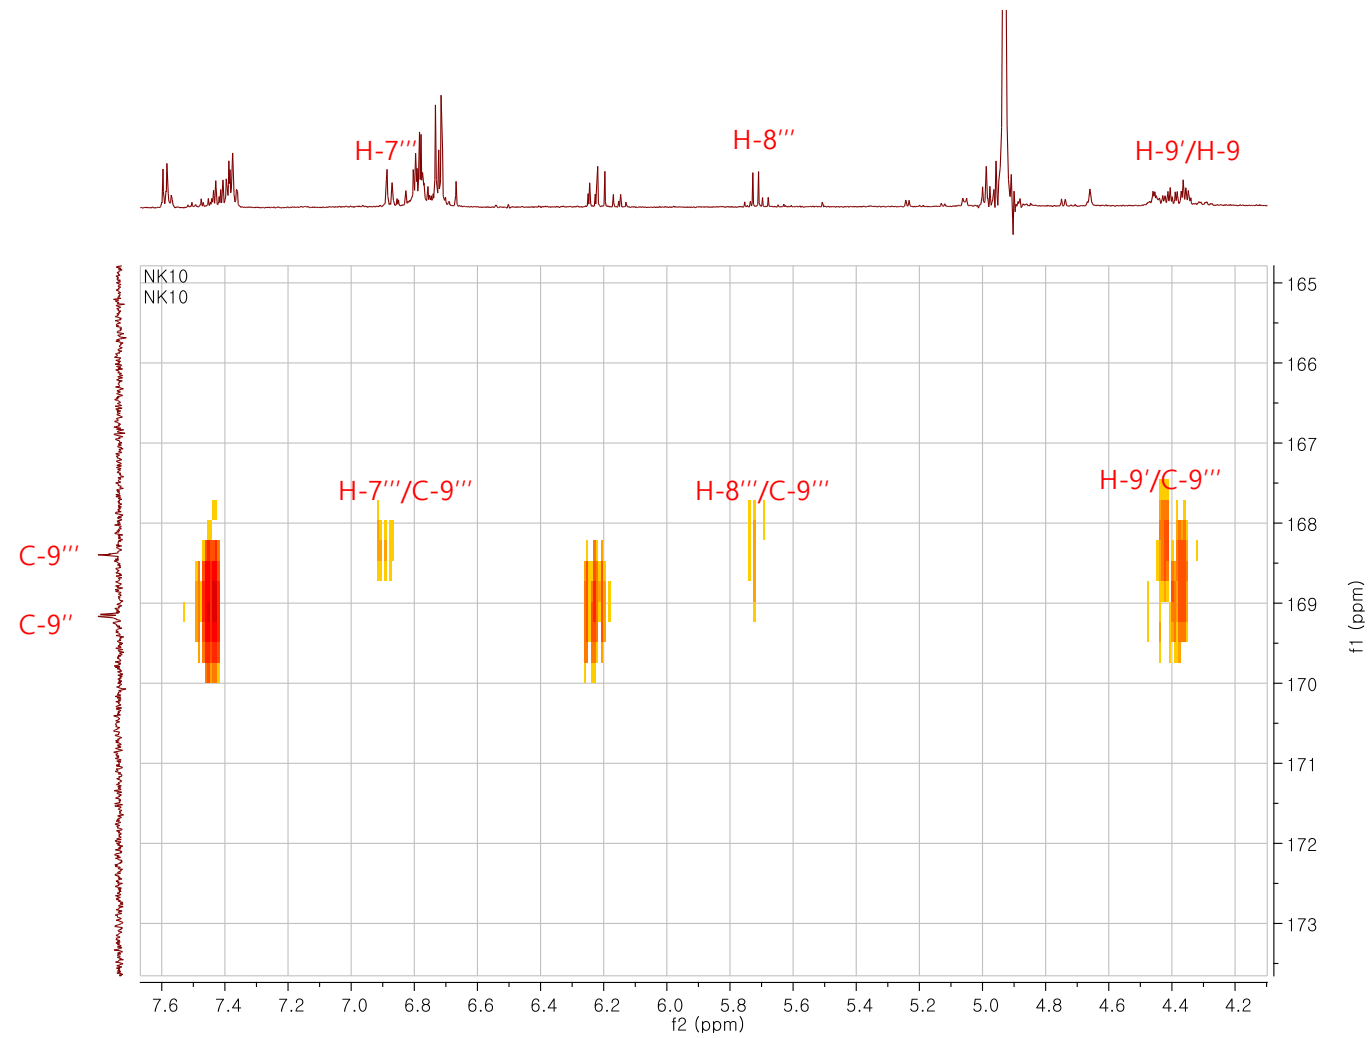

## General Experimental Procedures.

Optical rotations were measured using a Jasco P-1020 polarimeter (Jasco, Easton, MD, USA). Infrared (IR) spectra were recorded with a Bruker IFS-66/S FT-IR spectrometer (Bruker, Karlsruhe, Germany). Ultraviolet (UV) spectra were acquired on an Agilent 8453 UV-visible spectrophotometer (Agilent Technologies, Santa Clara, CA, USA). Circular dichroism (CD) spectra were recorded with a JASCO J-810 spectropolarimeter (Jasco). Electrospray ionization (ESI) and high-resolution (HR)-ESI mass spectra were recorded using a Waters Micromass Q-ToF Ultima ESI-TOF mass spectrometer (Waters, New York, NY, USA). Nuclear magnetic resonance (NMR) spectra, including those from  $^1\text{H}$ - $^1\text{H}$  correlation spectroscopy (COSY), heteronuclear single quantum correlation (HSQC), heteronuclear multiple bond correlation (HMBC), and nuclear overhauser effect spectroscopy (NOESY), were recorded with a Bruker AVANCE III 700 NMR spectrometer operating at 700 MHz ( $^1\text{H}$ ) and 175 MHz ( $^{13}\text{C}$ ) (Bruker, Karlsruhe, Germany), with chemical shifts given in ppm ( $\delta$ ) for  $^1\text{H}$  and  $^{13}\text{C}$  NMR analyses. Preparative high performance liquid chromatography (HPLC) was performed using a Waters 1525 Binary HPLC pump with a Waters 996 Photodiode Array Detector (Waters Corporation, Milford, CT, USA). Semi-preparative HPLC was performed using a Shimadzu Prominence HPLC System with SPD-20A/20AV Series Prominence HPLC UV-Vis detectors (Shimadzu, Tokyo, Japan). LC/MS analysis was performed on an Agilent 1200 Series HPLC system equipped with a diode array detector and 6130 Series ESI mass spectrometer using an analytical Kinetex C18 100 Å column (100 × 2.1 mm i.d., 5  $\mu\text{m}$ ; Phenomenex, Torrance, CA, USA). Silica gel 60 (70-230 mesh and 230-400 mesh; Merck, Darmstadt, Germany) and RP-C<sub>18</sub> silica gel (Merck, 40-63  $\mu\text{m}$ ) were used for column chromatography. The packing material for molecular sieve column chromatography was Sephadex LH-20 (Pharmacia, Uppsala, Sweden). Merck precoated silica gel F<sub>254</sub> plates and RP-18 F<sub>254s</sub>

plates were used for thin-layer chromatography (TLC). Spots were detected after TLC under UV light or by heating after spraying with anisaldehyde-sulfuric acid.

### **Cell Culture and Differentiation**

The C3H10T1/2 cell line was purchased from the American Type Culture Collection (Rockville, MD, USA). Cells were cultured in Dulbecco's modified Eagle's medium (DMEM; Hyclone, Logan, UT, USA) supplemented with 10% fetal bovine serum (FBS; Hyclone) and antibiotics (penicillin and streptomycin; Hyclone) and were incubated at 37°C under 5% CO<sub>2</sub>. For adipocyte differentiation, C3H10T1/2 cells were seeded at a concentration of  $2.5 \times 10^4$  cells/mL in 6-well tissue culture plates, and then confluent cells were incubated for 2 days in DMEM supplemented with 10% FBS, 1 µM dexamethasone (Sigma, St. Louis, MO, USA), 0.5 mM isobutyl-1-methylxanthine (Sigma), 10 µM troglitazone (Sigma), and 5 µg/mL insulin (Sigma). Cells were refreshed with DMEM containing 10% FBS, 10 µM troglitazol, and 5 µg/mL insulin every 3 days for a total of 8 days. Osteoblast differentiation media, which consisted of 5% FBS, 50 µg/mL ascorbic acid (Sigma), and 10 mM β-glycerophosphate (Sigma), was changed every 3 days for a total of 9 days.
